# Supplementary material for: VARIFI—Web-Based Automatic Variant Identification, Filtering and Annotation of Amplicon Sequencing Data
Source: MDPI journal article supplement (doi:10.3390/jpm9010010), 2019-02-01
Supplement: s1 [file s1]

# An example of calculating *var* and *frmode*

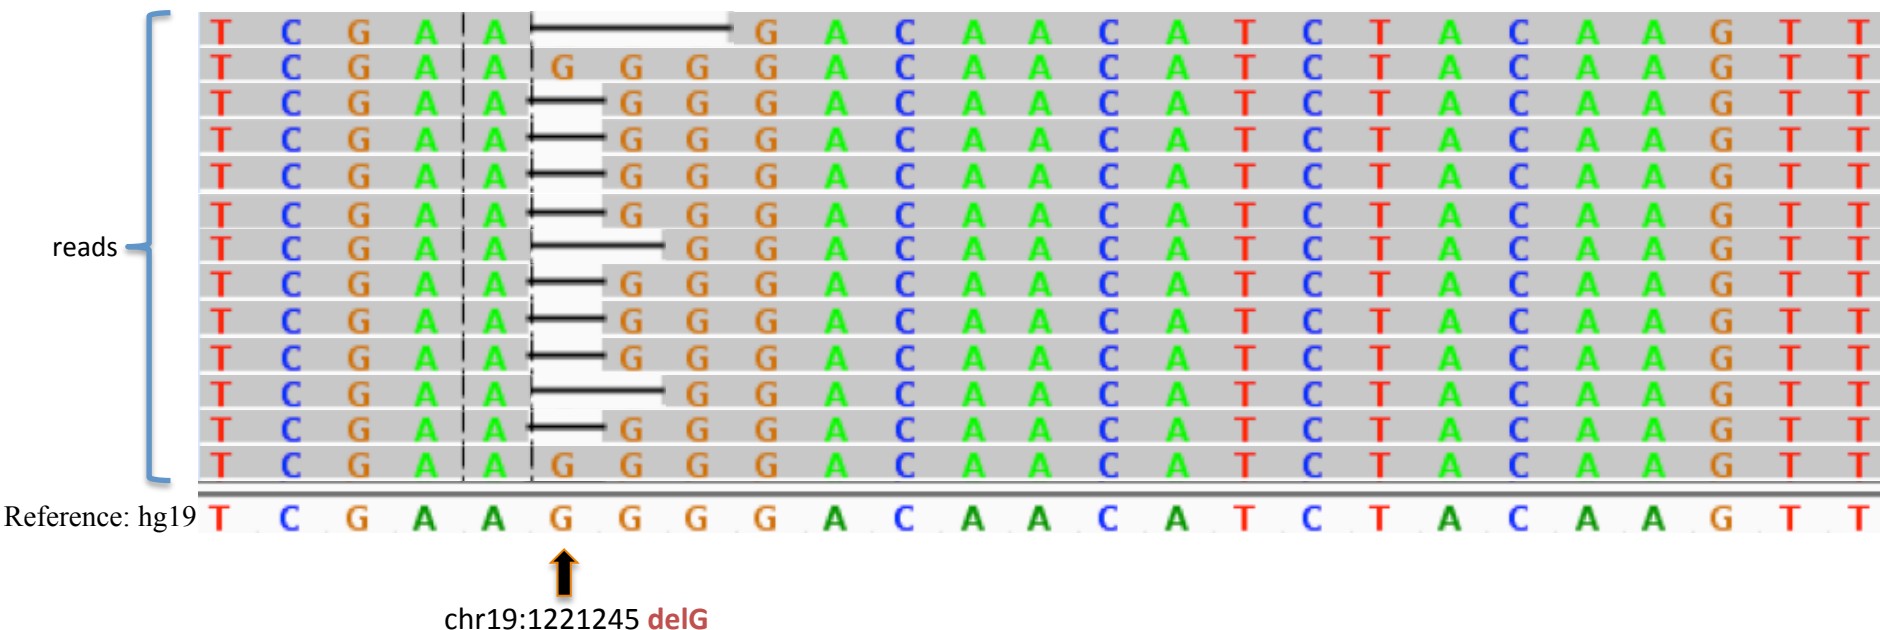

$N$  = number of reads containing indel (deletion of G in this example) at the indel position (e.g. chr19:1221245) = 11

$X$  = vector of size  $N$  containing indel (deletion) lengths = [1,2,1,1,1,2,1,1,1,3]

$\mu$  = mean of indel lengths =  $(1+2+1+1+1+2+1+1+1+3)/11=1.36$

*var* = variance of indel length (formula at the bottom right) = 0.41

Mode of distribution of indel lengths = the most common indel(deletion) length at the indel position = 1

*frmode* of indel lengths = frequency of the most common indel length at that position: in 8 out of 11 reads the most common indel length is 1, therefore *frmode* =  $8/11 = 0.73$ .

$$\sigma^2 = \frac{\sum (X - \mu)^2}{N}$$
